# Supplementary material for: Tracing immune cells around biomaterials with spatial anchors during large-scale wound regeneration
Source: PubMed Central journal article supplement (PMC10522601; doi:10.1038/s41467-023-41608-9), 2023-09-26
Supplement: 41467_2023_41608_MOESM1_ESM.pdf [file 41467_2023_41608_MOESM1_ESM.pdf]

1 **Supplementary information:**

2 **Tracing immune cells around biomaterials with spatial anchors during large-**  
3 **scale wound regeneration**

4 **Yang Yang<sup>12†</sup>, Chenyu Chu<sup>1†</sup>, Li Liu<sup>1†</sup>, Chenbing Wang<sup>1</sup>, Chen Hu<sup>1</sup>, Shengan Rung<sup>12</sup>, Yi**  
5 **Man<sup>1\*</sup>, Yili Qu<sup>2\*</sup>**

6 <sup>1</sup> Department of Oral Implantology & State Key Laboratory of Oral Diseases and National  
7 Clinical Research Center for Oral Diseases, West China Hospital of Stomatology, Sichuan  
8 University; Chengdu 610041, China.

9 <sup>2</sup> Department of Prosthodontics & State Key Laboratory of Oral Diseases and National  
10 Clinical Research Center for Oral Diseases, West China Hospital of Stomatology, Sichuan  
11 University; Chengdu 610041, China.

12 \* Corresponding author. Email: [manyi780203@126.com](mailto:manyi780203@126.com) (Y.M.) & [qqyili@126.com](mailto:qqyili@126.com) (Y.Q.)

13 † These authors contributed equally to this work

14 \* These authors jointly supervised this work

15

16 **This PDF file includes:**

17 Supplementary Fig. 1 Evaluation of the healing process of splinted and unsplinted wounds.

18 Supplementary Fig. 2 Analysis of Ctrl\_LW and ECM\_LW samples.

19 Supplementary Fig. 3 Gating scheme for T cells and macrophages.

20 Supplementary Fig. 4 Overview of the single-cell transcriptome analysis between ECM\_LW and  
21 Ctrl\_LW.

22 Supplementary Fig. 5 Further analysis of fibroblasts and T cells between ECM\_LW and  
23 Ctrl\_LW.

24 Supplementary Fig. 6 Subclustering analysis of neutrophils and dendritic cells between  
25 ECM\_LW and Ctrl\_LW

26 Supplementary Fig. 7 Histological analysis of WT and Rag2<sup>-/-</sup> mice treated with biomaterials.

27 Supplementary Fig. 8 Overview of the single-cell transcriptome analysis between WT and Rag2<sup>-</sup>  
28 <sup>-/-</sup> mice treated with biomaterials.

29 Supplementary Fig. 9 Subclustering analysis of neutrophils and dendritic cells between WT and  
30 Rag2<sup>-/-</sup> mice.

## Supplementary Figures

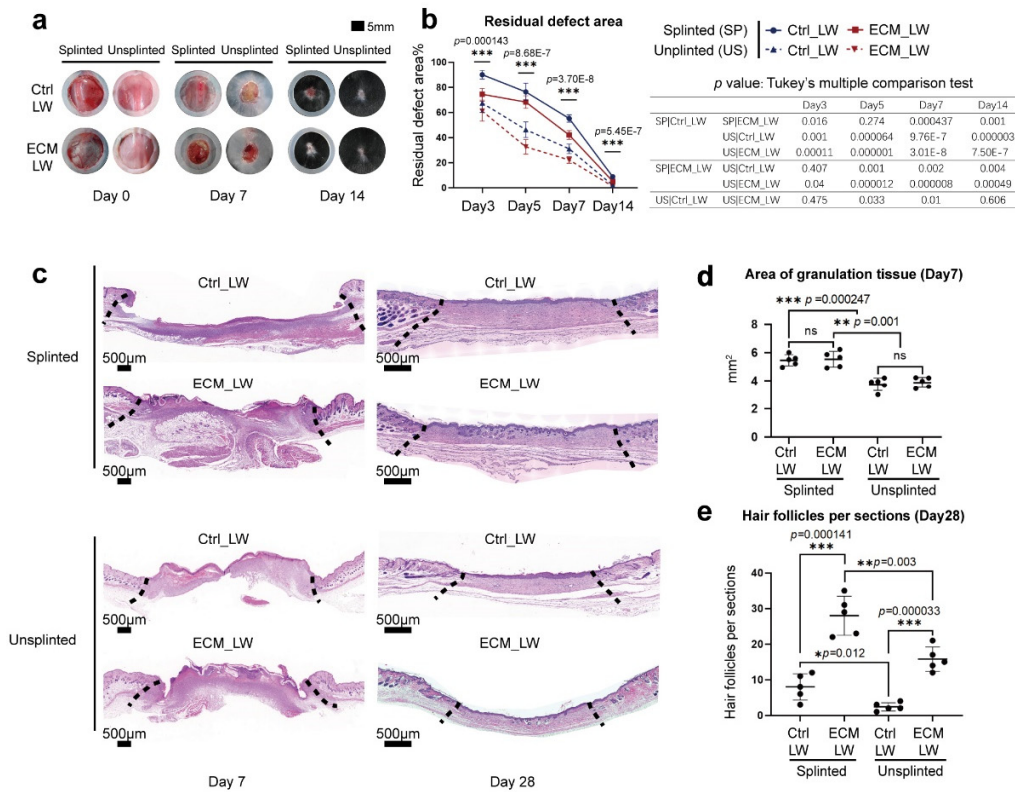

32

33

**Supplementary Fig. 1 Evaluation of the healing process of splinted and unsplinted wounds.**

34

(a) Residual wound area of splinted and unsplinted wounds treated with saline or ECM scaffolds,

35

and (b) corresponding analysis (Data are presented as mean  $\pm$  SD,  $n=4$  biologically independent

36

samples, one-way ANOVA with Tukey's multiple comparison test,  $p$  values shown in the

37

figure). (c) Representative H&amp;E images of each group on POD 7 and POD28. (d) Quantitative

38

evaluation of the area of granulation tissue (Data are presented as mean  $\pm$  SD,  $n=5$  biologically

39

independent samples, two-tailed t-test,  $p$  values shown in the figure). (e) Histologic

40

quantification of de novo HF's on POD28 (Data are presented as mean  $\pm$  SD,  $n=5$  biologically

41

independent samples, two-tailed t-test,  $p$  values shown in the figure).  $p$  value:  $*p < 0.05$ ,  $**p <$ 

42

 $0.01$ ,  $***p < 0.001$ , and  $****p < 0.0001$ .

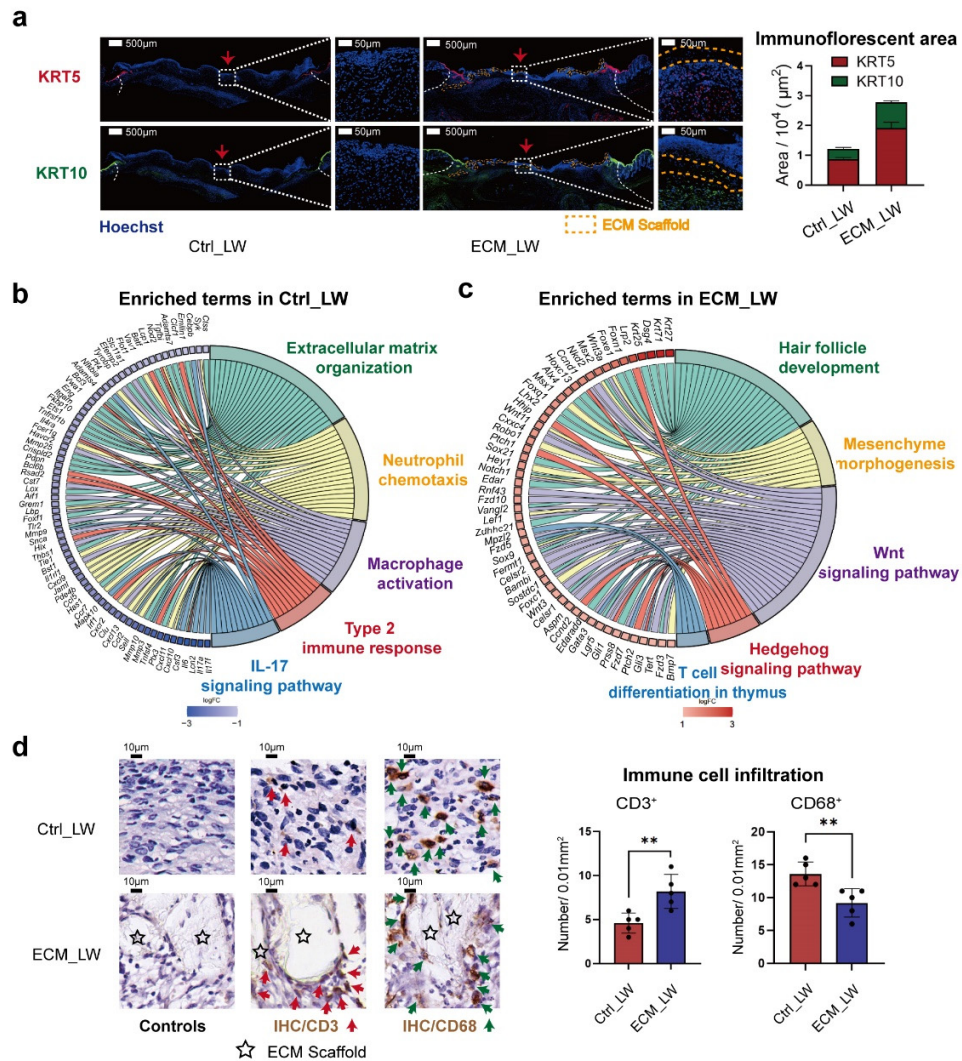

44

45 **Supplementary Fig. 2 Analysis of Ctrl\_LW and ECM\_LW samples.** (a) Representative IF  
 46 images of IFEB<sup>1</sup> using KRT5 (red) and IFED<sup>1</sup> using KRT10 (green) on POD7 and  
 47 semiquantitative evaluation of the fluorescent area (Data are presented as mean ± SD, n=4  
 48 biologically independent samples, KRT5: two-tailed t'-test, \*\**p* = 0.001; KRT10: two-tailed t-  
 49 test \*\*\*\**p* = 0.000008). (b-c) Chord plots of enriched terms in Ctrl\_LW group (b) and ECM\_LW  
 50 group (c). (d) Representative IHC images of stained T cells (CD3<sup>+</sup>) and monocyte-macrophages  
 51 (CD68<sup>+</sup>) on POD7 and corresponding quantitative analysis (Data are presented as mean ± SD,  
 52 n=5 biologically independent samples, two-tailed t-test, CD3 \*\**p* = 0.007; CD68 \*\**p* = 0.008). *p*  
 53 value: \**p* < 0.05, \*\**p* < 0.01, \*\*\**p* < 0.001, and \*\*\*\**p* < 0.0001.

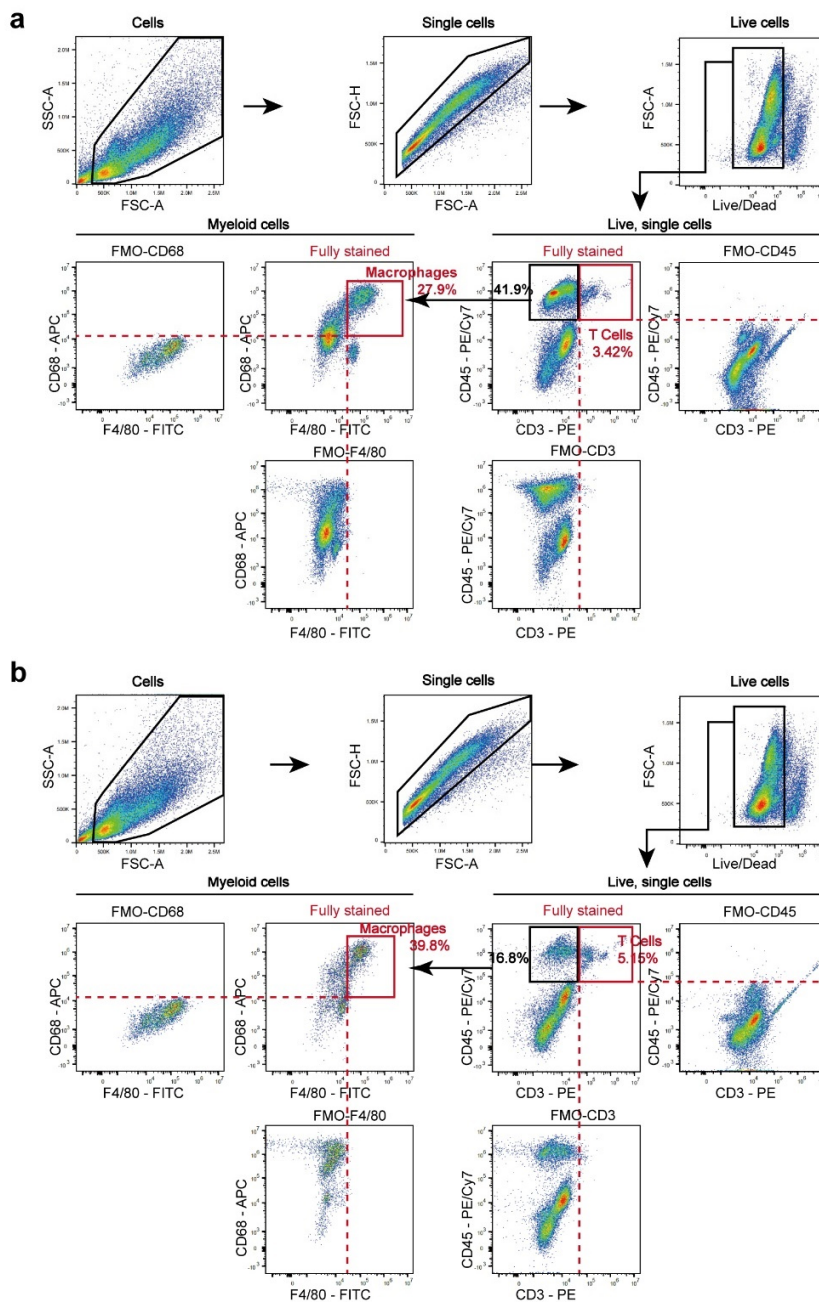

54

55

56

57

58

**Supplementary Fig. 3 Gating scheme for T cells and macrophages.** Multicolor flow cytometry gating strategy to isolate T cells ( $CD45^+CD3^+$ ) and macrophages ( $CD45^+CD3^-CD68^+F4/80^+$ ) from single cell suspension. Representative flow cytometry plots of Ctrl\_LW (a) and ECM\_LW (b) samples on POD7. Abbreviation: FMO, Fluorescence Minus One.

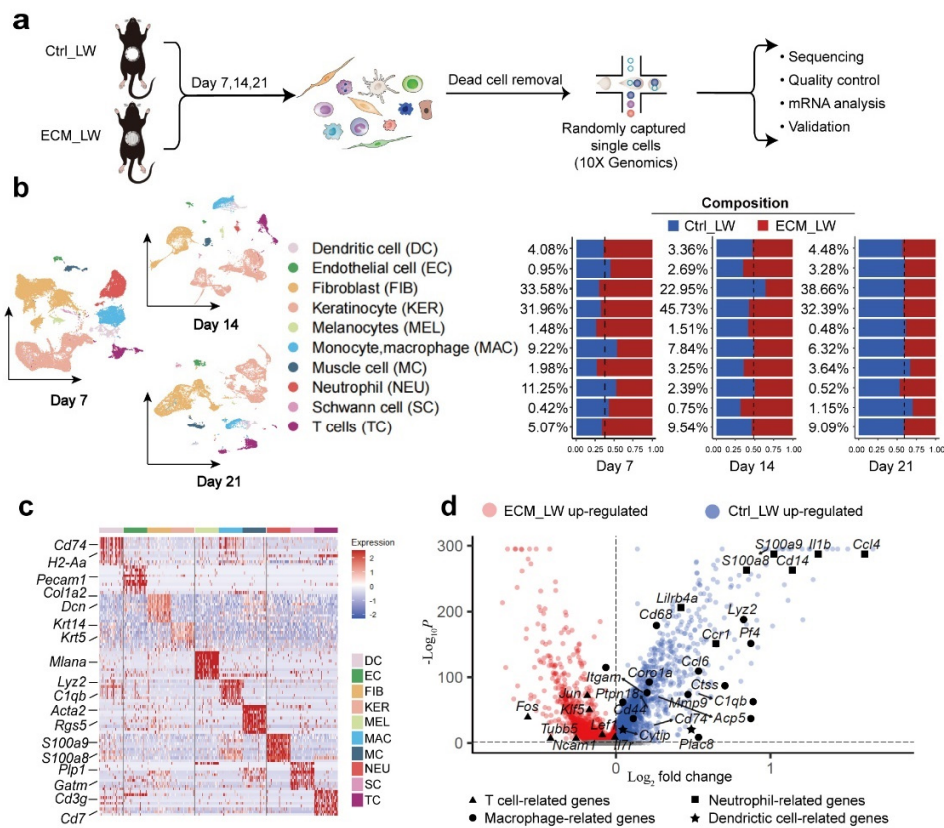

59

60

61

62

63

64

65

66

**Supplementary Fig. 4 Overview of the single-cell transcriptome analysis between ECM\_LW and Ctrl\_LW.** (a) Single-cell experiment workflow. (b) Cells are categorized into 10 main clusters. The number of cell populations in each cluster, number of cells (%), and composition of ECM\_LW and Ctrl\_LW groups are listed. (c) Heatmap showing top 10 marker genes for each cluster. (d) Volcano plot showing interested differentially expressed genes in ECM\_LW and Ctrl\_LW group (day 7).

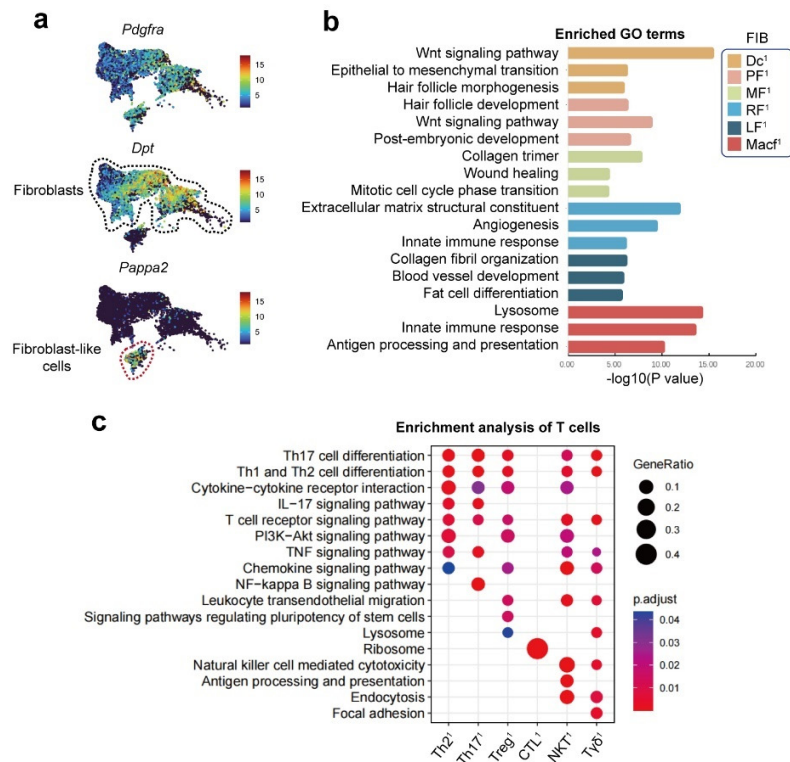

68

69

70

71

72

73

**Supplementary Fig. 5 Further analysis of fibroblasts and T cells between ECM\_LW and Ctrl\_LW.** (a) Feature plot of the marker genes of pan-fibroblasts (*Pdgfra*), fibroblasts (*Dpt*), and fibroblast-like cells (*Pappa2*). (b) GO enrichment analysis of fibroblast subtypes. (c) Enrichment analysis of T cell subtypes.

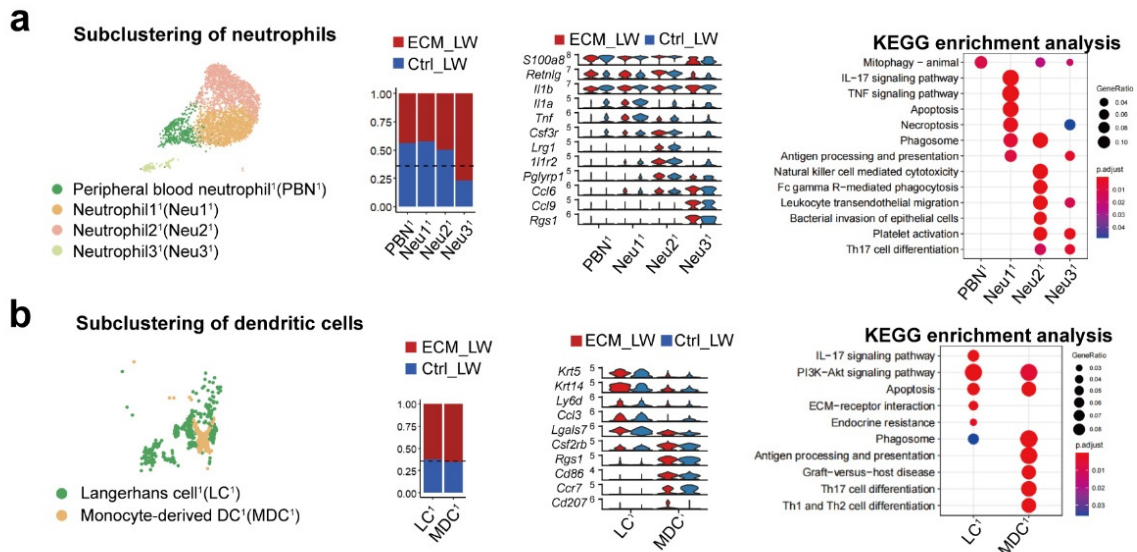

74

75

76

77

78

79

80

**Supplementary Fig. 6 Subclustering analysis of neutrophils and dendritic cells between ECM\_LW and Ctrl\_LW.** (a) Subclustering of neutrophils showing four subsets. The marker genes, composition, and KEGG enrichment analysis for each subset are listed. (b) Subclustering of dendritic cells showing two subsets, marker genes, composition, and KEGG enrichment analysis are listed.



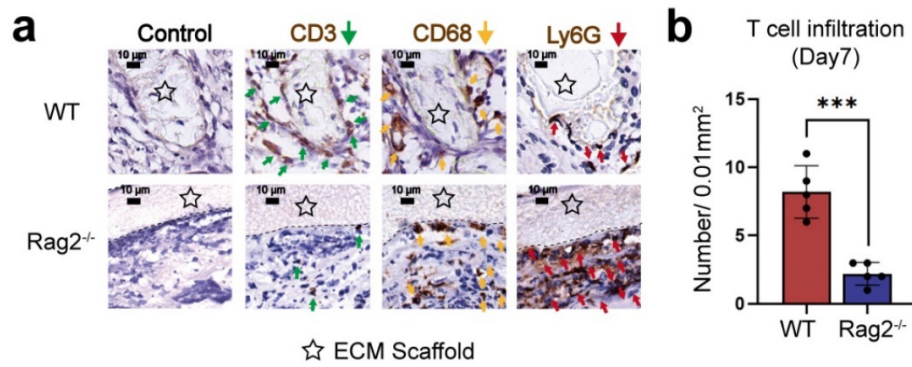

81

82 **Supplementary Fig. 7 Histological analysis of WT and Rag2<sup>-/-</sup> mice treated with**  
 83 **biomaterials.** (a) IHC staining of CD3, CD68, and Ly6G. (b) semi-quantification of CD3<sup>+</sup> T cell  
 84 infiltration (Data are presented as mean ± SD , n=5 biologically independent samples, two-tailed  
 85 t-test, \*\*\**p* = 0.000210). *p* value: \**p* < 0.05, \*\**p* < 0.01, \*\*\**p* < 0.001, and \*\*\*\**p* < 0.0001.

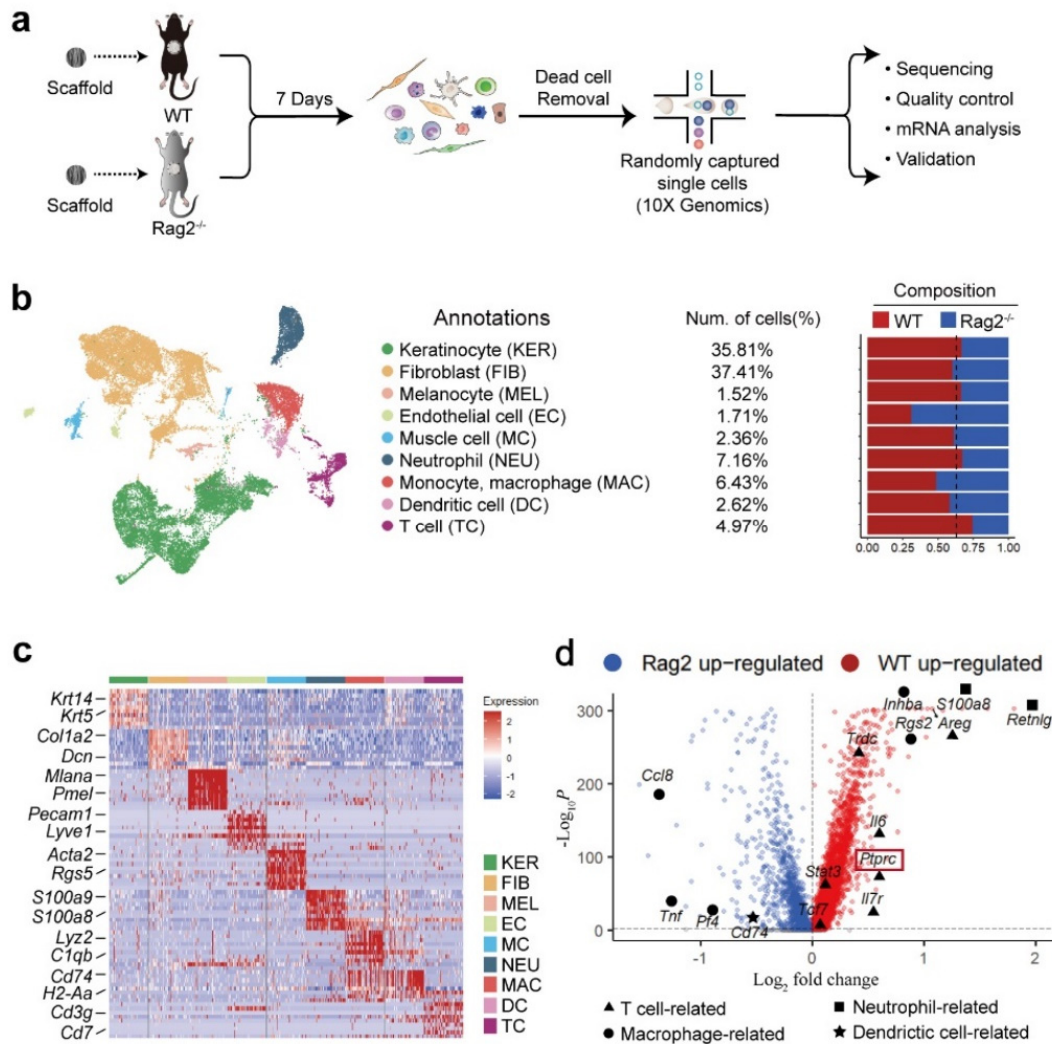

86

87 **Supplementary Fig. 8 Overview of the single-cell transcriptome analysis between WT and**  
 88 **Rag2<sup>-/-</sup> mice treated with biomaterials.** (a) Single-cell experiment workflow. (b) Cells are  
 89 categorized into nine main clusters. The number of cell populations in each cluster, number of  
 90 cells (%), and composition of ECM\_LW and Ctrl\_LW groups are listed. (c) Heatmap showing  
 91 the top 10 marker genes for each cluster. (d) Volcano plot showing interested differentially  
 92 expressed genes in WT and Rag2<sup>-/-</sup> group (scRNA-seq).

93

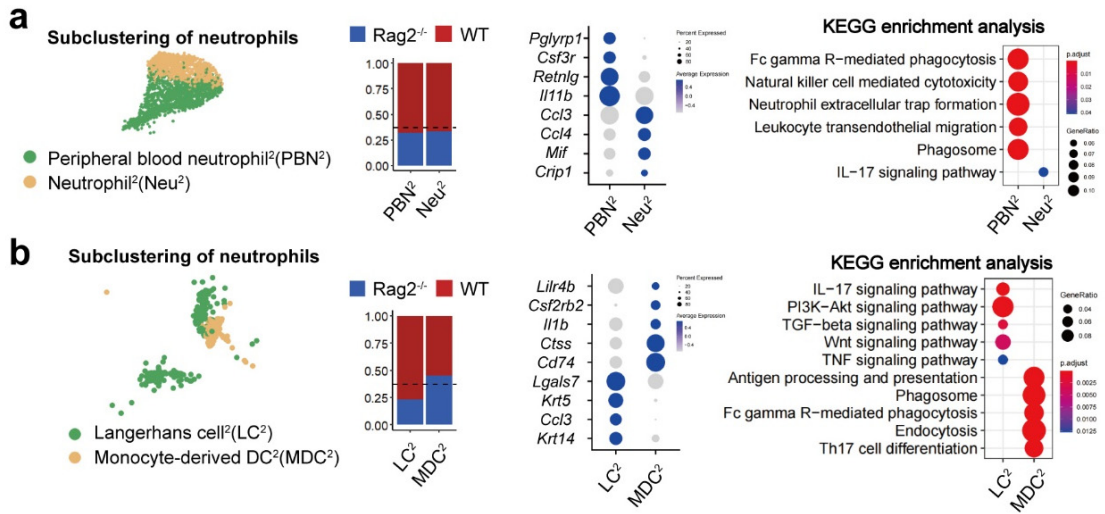

95

96 **Supplementary Fig. 9 Subclustering analysis of neutrophils and dendritic cells between WT**  
 97 **and Rag2<sup>-/-</sup> mice.** (a) Subclustering of neutrophils showing two subsets. The marker genes,  
 98 composition, and KEGG enrichment analysis for each subset are listed. (b) Subclustering of  
 99 dendritic cells showing two subsets, marker genes, composition, and KEGG enrichment analysis  
 100 are listed.
